# Supplementary material
Source: publisher figshare collection journal article supplement (https://plos.figshare.com/articles/dataset/_/125204)

|    |                                                                                   |       |
|----|-----------------------------------------------------------------------------------|-------|
| Bt | --AG-----TTGTTTCCC-TCAGGTTCTCTGTTATTTCTCTGATAAAC--TATATAGGACAGTTTGTGAGATTAA-TTG   | -938  |
| Cf | --AGTTTTCAATTGTTTCCC-TCTGGTTCTCCATTGTTTCTCTGATACAT--AATATAGGAAAGTTTATGAGATTGA-AT- | -955  |
| Dn | --AGTTTCTTTTGGCTCCCTTTGGGTTCTTTGTTGTTCTTTGATAAAG--AACACCAGAGAGTTTATTAGAGTAG-TGG   | -801  |
| Ec | --TGTG---TTGTCTCCC-TCAGGTTCTCTATCGTCCCTCTGATAAAC--GATATAGGACAGTTTATGAGACAAA-GTG   | -967  |
| Hs | --AGTTGCCATTGTCTCCCTTCTGGTTCTCTGTTGTTTCT--CGAAT--GACATAGAAGAGTTTATGAGATTAA-TTG    | -1014 |
| La | --AGCCTCCACTGGCTCCC-TAAGGCTCTCCACTTTCTCTCTGACGAAC--AGTAAAGGAG-GTTCATGAGGTTCTGTTTG | -954  |
| Oc | CTGGCTGTCTTTCTCTCC-----ATCCTCTGTTTCTCTGTCAAACTTTTTATAGGACAGTTTATGACATCA-----      | -892  |
| Sa | -----ATATTC-----TGGGG--GATGCAGGGAGGGAGGGAAAGAGGG-AAAG                             | -716  |
| Ss | --AGTTTCCATTGTCTTCC-TCAGGTTCTCTATTGTTTCTCTGATAAAC--AATATAGGACAGTTTATGAGATTAA-TTA  | -934  |
| Cp | -----TCCCTC-----TAAGTCTTTGTTGTTTCT--CAAAC--AATGTAAGAATAGTTTATGAGGATAA-TTG         | -978  |
| Mm | -----                                                                             | -553  |
| Rn | -----                                                                             | -600  |
| Mr | -----                                                                             | -545  |

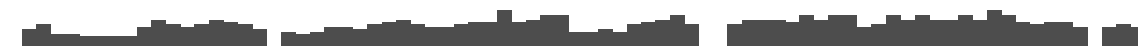

|    |                                                                        |      |
|----|------------------------------------------------------------------------|------|
| Bt | CTTCTCACC AAAATAGCTATGTTTCT-----GGGGGCGGCTT-----TGGCTTTTATA-----       | -890 |
| Cf | CTTCTCACTGAAAATAGCCAGGTTTCTG-----GGGGGCAATTTTGG-----CTTTTATA-----      | -906 |
| Dn | CTTTTCACTGAATTCAACAAGTTTCT-----GGGACTACTTTAGCT-----TTTATC-----         | -754 |
| Ec | CTTCTCACTGACATAGCCAGATTTC-----GGGGGCAGCTTTAGCTTTTCTTCTAT-----          | -913 |
| Hs | CTTCTCACTGAAAATAGCCAGGTTTCT-----GAGGGCAGCTTTGGC-----TTTTATA-----       | -966 |
| La | CTTCCCCTGAAAACAGCCAGG-CTCT-----GGGGAT-GCTTTGGC-----ATTCAAC-----        | -908 |
| Oc | CTTTCTAATGAAAATTGCCAGGTTTCTGGGGAGGAGATGGGACAGCTTTGGATT-----TTACG-----  | -834 |
| Sa | -----AGAGAGAGAANCAGAGATT-----GGGGGG-----                               | -690 |
| Ss | CTTCTCATTGAAGTAGCCAGCTTTCT-----AGAGGCAGCTTTGGTCTGGCCTTTATA-----        | -881 |
| Cp | TTTCTTAATGAAAATAATCAGGTTCCCT-----GGGGGAAGCTT-----TTACTTTTATTTTCTTAAACT | -919 |
| Mm | -----                                                                  | -553 |
| Rn | -----                                                                  | -600 |
| Mr | -----                                                                  | -545 |

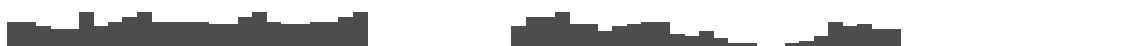

|    |                                                                                |      |
|----|--------------------------------------------------------------------------------|------|
| Bt | TGAA-----CATTTT-----CCTACCAGTTACTGGCA-----                                     | -863 |
| Cf | AGAG-----CTTTTG-----CCTATCAGTTACTGTCA-----                                     | -879 |
| Dn | TCAG-----CTTTTTTC-----CTACCACCTTAGTGCC-----                                    | -726 |
| Ec | TGAG-----CTTTTT-----CCTACTA-TTACTGCCA-----                                     | -887 |
| Hs | TGAG-----CTTTTTCTTCTTACCACCTTATCAGTTACTGACA-----                               | -929 |
| La | TGAG-----AGTTTC-----TTACTGCTG-----                                             | -889 |
| Oc | TGAA-----CTTTATTTTC-----TACCAGTTATCTCCATTACCACTCT-----                         | -795 |
| Sa | GGAGTGATA-----GCCTTGTC-----ATAAACTTCCACC-----                                  | -660 |
| Ss | TGAG-----CATTTT-----TCTA-----AGCA-----                                         | -863 |
| Cp | GAAAGTGTAGAGATGGTACCCTGGGCTTGCCTCAGGGTG-----ATACATCCCCACCGTAATTTGGCTTTACAGTTGC | -844 |
| Mm | -----                                                                          | -553 |
| Rn | -----                                                                          | -600 |
| Mr | -----                                                                          | -545 |

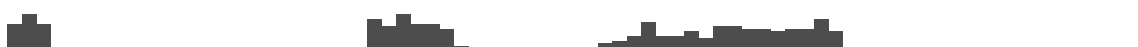

|    |                                                                          |      |
|----|--------------------------------------------------------------------------|------|
| Bt | -----GCGGGTGAACTTCACTACTGTATTCCT--ATGACTGCTTCAGTG                        | -821 |
| Cf | -----GTGAGTGAACTTCACTTCTGTGACCTT--AGGATTGGTCAATG                         | -837 |
| Dn | -----GTTGATTAACTTCTTACTATGCTGTTA--TGATTGGTCAATG                          | -684 |
| Ec | -----GTGGGTGAACTTCACTACTGTGCTCTT--ATGATTGGTTCGATG                        | -845 |
| Hs | -----GAGGGTCAACTTCACTACTGTGTCTAT--ATGGTTGGTCAATG                         | -888 |
| La | -----GTTGTGAGCTTCAGTGTTCGATGTTGTCTCTCGTTGATCCAGTG                        | -844 |
| Oc | -----GTAGGTAAACCTCACTACTGTG-----CAAAG                                    | -768 |
| Sa | -----CCACCCACACCAAGATTCAAAGGAAAACTACTACA-----GCTTGCTTCNTTG               | -611 |
| Ss | -----GCCGG--CACCACTACTGTACTCTT--ATGGTGGGTTCAATG                          | -825 |
| Cp | CAGTTACTGCCAACCAGTCACTATTGTGTTTTAGGATTGATTCTCCATTGTTATGATT--GATTGCTCATTG | -771 |
| Mm | -----TTTGTCCCAAGG                                                        | -541 |
| Rn | -----TTTTTCTCAAAG                                                        | -588 |
| Mr | -----TTTGGTTCAAAG                                                        | -553 |

CNS2

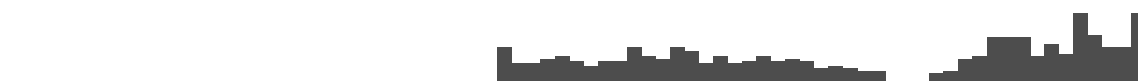

## CNS2

Bt TT-GGGGTTGT CAGATT CACGGAGTAAGTAGAAAAAA--TACT-----GAAGATTGAG----- -771  
 Cf TTGGGGGTCATCAGATTCATGGAGGAAATAG-GAAAA--TACTA-----AAAAGATTAAAG----- -786  
 Dn TT-GGAGTCTTCAGATTCCTAGAGAAATGT--AGGCAACTACT-----AAAAGACTGAG----- -635  
 Ec TT-GGGGTCATCGGATTCACGGAGAAAAGTAGA-AAAA--TACT-----AAAAGATTAAAG----- -796  
 Hs TT-GGGTTCCTCAGATTCATGGAGGAAATA-GGAAAA--TAGT-----AAAAGATTAAAG----- -839  
 La TT-ATGATTGAGCAAATC---GACGAAGTA-AGCAAA--TACT-----AAAAGATGAAG----- -799  
 Oc TT-GGAGCTATCAGATTC AACGAAGTAG-----AAAAGTAAGG----- -731  
 Sa GT-GTTGTT-----TTCAAGTACA-----CGCT----- -589  
 Ss TT-GGGGTCATCAGATTCATGGAAGAAG--GAGAAGA--TACT-----AAAAGATGAAG----- -777  
 Cp TT-ATGATTGATTG-TTCATGGAGG-----AAGAAATAAT-----AAAAGATCAAG----- -728  
 Mm TATGGAGTCACCAGGTTCCCGAGA-----GAAAAGACTAAGATG----- -504  
 Rn TTTGGAGCCATCAGTTTCTCGGAA-----ACTGGATGAAAAGACTAAAAATGACCAAGC----- -536  
 Mr TTTGGAGTTACCAGATTCCCGGA-----AAGTACAAAAATGA----- -496

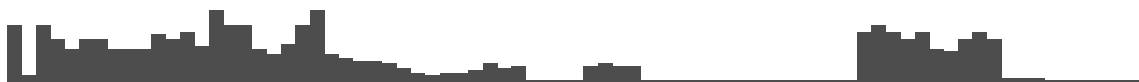

Bt -----GGTTCACAGTTTAAAAATTACAAGTAATATA-- -740  
 Cf -----GACTCACGGTTTAAAAATTGCAAAACAGATCACAC -753  
 Dn -----AATTTCACAGTTTAAAACATTACAAAGAGGTT-- -605  
 Ec -----GATTTCGAGTTTAAAACTTACAAAACAGGTCAAAA -763  
 Hs -----GAGTCATAGTTAAAAAATTACAAAACAGGTCAACA -806  
 La -----GAAATACAGTTTCAAGATTAAAAAATCTGGT--- -770  
 Oc -----AAGTAAAAAGTTAGGGACTCACTAACTGCTGACA -698  
 Sa -----GACCCAGTAA-TTTAAAAATT-----CCTCTTACA -562  
 Ss -----GTTTCACAGTTTAAAA--CATTACA-- -754  
 Cp -----GACTAATAGCTTTAAAAAATAGAAACAGGTCAACA -695  
 Mm -----CCAAATGACCCAAAACATATGAGCGTAAGCCCTCCAAATCGGTCACA -459  
 Rn GCAAAATTCAAGCGTAAAATTCAAGACGTAAAAAATCCAAAGACGCAAAATTCCAAGCGTAAGTCCCGCAAAATAGGTCACA -456  
 Mr -----TACAGAACCAAAATTTCTGTGCGCAATCAGTACAAATAGGTCACA -452

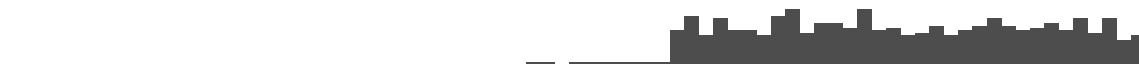

Bt -----GATTGGTTAGG-GGCTAAATCAGCATTCTGTGAAATGATT--TTTCTTTCTTCT--CTCTCTT- -684  
 Cf GACAGTACAGCTTCTTGATTATTTAGT-GGCCAAAATGACATTCTGTGAAATTAACCTTCTGTTCCTTCTCT--TTCTCTT- -678  
 Dn -ACAGTTTTCTCTCTGGATTACTTAAGTGGTCAAATGGCCATTCTTTGATCTGTCTT--CCTTTACG--TCTCTTT- -534  
 Ec AACAGTACTC-----GATTATTTTCGG-GGCCAAATTTGGCATTCTGTGAAATGCCTTCTTTCTTCTCT--CTCTTTT- -694  
 Hs AACAGTACTCTTTCTTGATTATTTAGG-AAACCAAAATAGCCATTCTATGAAATGTCTTTCTTTCTTTCTTT--CTCTCTT- -731  
 La GGCAGTGTGCTTATCAATTGTTTAGG-GGCCAAAATAGCCTTTCTGTGAGATG---CGTTCCTGTGT--CTCTCCG- -700  
 Oc GAC-----TAGG-GACCACACAGCCATTCTGTTAAATGTC---TACCTGACTGTCTTCTTTT- -645  
 Sa A-----ATTTCT-----CAATTG-----TTCTT- -544  
 Ss -----GTTTACTCAGG-GGCTACATGGACTTCCTGTGAAATGTC--TTTCTCTCT--CTGTCTT- -698  
 Cp AACAGCACTTCT-----CGATTAGAGAC-----CTCCTT- -666  
 Mm ACT-----AATACTCTGATAATTTAGG-AAACCAAGGAGCCATTTTGTGAGGCATTTCTACCTTTCTCT--CCTCA- -390  
 Rn ACC-----AGTACTCTGATAATTTAGG-AATCACGGAGCCATTTTGTGAGACATTTCCACCTTTCTCTGT--CCTGG- -387  
 Mr GCCAA--TAATACCTTAATAATTTAGG-AAACCAAGGAACGATTTTGTGAAACACCTCTTCTTTTCTTTA--CCTC- -381

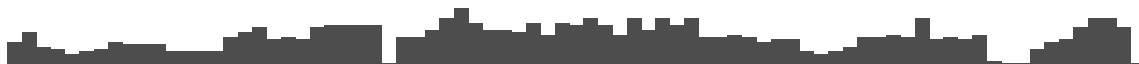

Bt -----GCTC-----ACT--TAGAAACA-----CT--TCCATTCTTCTATTTTCAAGGGGCCAC--AGAA- -637  
 Cf -----GCTCACCGTTTGACT-----TAAAAGCA-----CT--TCTACATCTCCATGATCGGGGGCCAT--ACAA- -623  
 Dn -----GCTCACCAATTGACT-----C--AAGTA-----TT--TTCTTTCTTCTATGGTCAGGGGTCAT--AC-A- -482  
 Ec -----GCTTATCAATTAACT-----TATAAGCA-----CT--TCTAATCGCCTGCGATCAGGGGGCCAT--ACAA- -639  
 Hs -----GCTCACCAATTGACT-----CGTAAGCA-----CT--TCCGTTCTTCTTATGGTTGGGAGCCAT--AG-A- -677  
 La -----AC-----CG-----CATAAAGTG-----CTTAACCTCACTTTCCAATTGTGGGCGCCAC--AG-C- -653  
 Oc -----GTTAATCAATTGGCTG-----CAAAAGCA-----GTTAG--AGTCTCTTATCACCTGGGGCTATGG-G- -590  
 Sa -----NGCCACACCTGGTAT-----TACTCAGGAGTTGATCT-----A----- -511  
 Ss -----GCTCACCAAGTTAACT-----TAGAAGCG-----TT--TCCAGTCTCCTATGATCAGCAGCCAT--GAAA- -643  
 Cp -----AGTTACCAATTGAATCCTAAATACTTATGGTCTGGTCTC-----CATGAATAGGGGGCCACCCAA-- -607  
 Mm TCTGAGGTGCGCAACTAATG-----CAGAAGAAC-----TTCTAGTGTCCAAGAC-CGGAGCGA--CACAC- -333  
 Rn ATTGAGCTTACCACCTAATT-----CATGGGAACCTT-----TTCTTGTCTCCAAGACCGGGAGCGA--TACA- -326  
 Mr ---GAGCCCAACCAATTGATC-----CGTAAAGCA-----TTTTAGTACCAAGACGAGGGGCTA--TGCA- -326

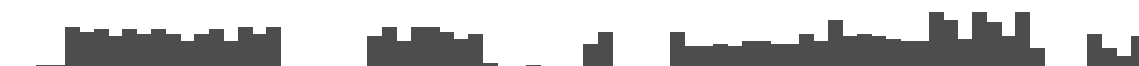

\*

|    |                                                                             |      |
|----|-----------------------------------------------------------------------------|------|
| Bt | ATGC--AGTGCTGGAGTAGAAAAATACACTGA-----CTCAGA-----A-----TTAC--AGTATGTGACT---  | -586 |
| Cf | AGGCAGAAATGCTGGAGTAGAAAAATACACGGA-----CTCAAA-----A-----TCAT--GGTGTGTGACC--- | -570 |
| Dn | AGGCAGAGTGATGGAGTAGAAAAATAAATTCA-----ATCTGA-----A-----TCATG--GTGTGTGACT---  | -429 |
| Ec | AGACTTCGTGTTGGAGTAGAAAAATTTACTGT-----CTCAGA-----A-----TCAT--AGCGTGCAGACC--- | -586 |
| Hs | AGGTAGAGTGTTGGAGTAAAAAATACATTGA-----CTCTGA-----A-----TCATG--GTGTGTGACC---   | -624 |
| La | GGGCCCTGTACTGGGGTACAAGGAACACTCA-----ATCGCA-----G-----CC-----TGAGT---        | -608 |
| Oc | AGACAAAGTATTGGAGTAGAAAAATGCAGGGA-----CTGGGG-----AGTCGAGGGT-----GTGTGACT---  | -535 |
| Sa | -GGCTAAGTGT-----ATATATCTT-----TTTTATGTTTTGGTCC-----ACCTGG-----              | -470 |
| Ss | AGGCAGAGTGATGCAGTAGAAAAATACACTGA-----CTCAGA-----A-----TCTCTTGGTGTGTGACT---  | -588 |
| Cp | -GGTAAGGTGTTGAAAAAGTAAATACACTAA-----CTTGAGTCATGGTATGT-----GACCTAG-----      | -552 |
| Mm | TGGTT---TGTCCAAGTAGAAGATATATTGAAATTTTGCATAGA-----                           | -292 |
| Rn | AGGCCGGATGTCCAAGTAGAAGATATGTTGAAATTTTGCATAGA-----                           | -282 |
| Mr | AGGTTGGATGTCCAAGTAGACGATATATTGAAATATGCATA-----                              | -284 |

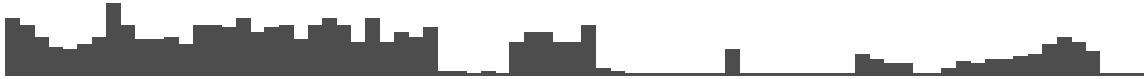

|    |                                                                        |      |
|----|------------------------------------------------------------------------|------|
| Bt | -----TTG-----AGCACATCATGTAA-----CTTTATGGGTCTC-----TTTTCC-----          | -549 |
| Cf | -----TCA-----TGCATATCATATAACAG-----CTTCAT---TATC-----TATCAA-----       | -534 |
| Dn | -----TCATC-----CACCCATT-----TTTTATGGGCTTCTATCTTGTAAATATATA-----        | -387 |
| Ec | -----TCA-----TGTACGTCGTGTAA-----CTTTCTGACAACC-----TATAAA-----          | -549 |
| Hs | -----TCG-----GGCACATGATGTAA-----CTCTATAGGACTCTATTTTAA---TGTATA-----    | -579 |
| La | -----CCA-----TGTACATTACTCAGC-----CTTTACGGCCCTC-----TGTATA-----         | -571 |
| Oc | -----TCA-----TGCACATAATTTCACTTTGTTTCTAATCTATGA-----                    | -497 |
| Sa | CAAAGCTCAGCG-----TTTACTCCTTG-----CTCTACA-----CTCA-----                 | -436 |
| Ss | -----TTGT-----TGCACATCATGTAA-----CTTTATGGGTCTC-----TTTTTC-----         | -550 |
| Cp | TGAACCTCA-----TTTAACCTTTATGGAT-----TTCTGT-----CTCATA-----              | -515 |
| Mm | CA--GGTGTGTG--CTAAATGTACACCCAAATGTTTA-----TGTGAAGTTC-----TACATA-----   | -241 |
| Rn | -----CATGGTGTGTGACCTAGTGTACATTATTTAACGTTTA-----TGGATAG-----TGTGCA----- | -232 |
| Mr | -----TACATTATACAACGTTTA-----TGTGCCCTTCC-----TATA-----                  | -251 |

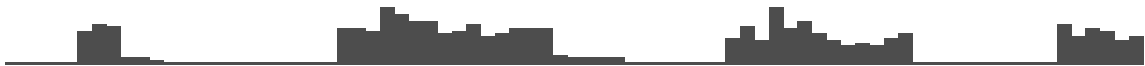

|    |                                                                                       |      |
|----|---------------------------------------------------------------------------------------|------|
| Bt | -----G--ACTAAACCTTCA-----CTATCACATTAGATAACGGAAAGGAAAAGT-----                          | -507 |
| Cf | ACATAGG--AACAAAACGGGCA-----CTATCTCATTAGATAAATGAAAAGGAAAAGT-----                       | -486 |
| Dn | AAACAGAGGGGATAACCCCTTTA-----CTATCACA--GGAGAATGGAAGGGAAA--                             | -341 |
| Ec | ACAAAGG--ACTAGACCTTCA-----CTATCGCCTTAGGTTATGGAAGGGGAAAGT-----                         | -501 |
| Hs | AAACAGG--AATAATCCTTTATTATTATCTATGCAATACATAATCCATTATCTATTACATGGGATAATGGAATGGGAAGT----- | -501 |
| La | AGGCAGGTAAATCATTCTTCA-----CTACCGCATTGATGATGCTA--GCGAAGT-----                          | -522 |
| Oc | -----ATGATTCCTTCAC-----CTGTATTGGTAAATGGAAGAGAAAAGT-----                               | -459 |
| Sa | --GTA-----TTACCTTCTGG-----                                                            | -422 |
| Ss | --A--AGTAAACCTTCA-----CTATCACGTTAGATAAATGGAAGGAAAAGT-----                             | -508 |
| Cp | ATGTA-----TAATCCTCTAGT-----ATCAGATAACGGAAAGGAAAAGT-----                               | -476 |
| Mm | AAC-----                                                                              | -238 |
| Rn | AA-----                                                                               | -230 |
| Mr | -----                                                                                 | -251 |

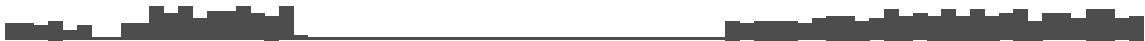

|    |                                                                                        |      |
|----|----------------------------------------------------------------------------------------|------|
| Bt | CCCCTG--AAGAGGGTTCTAACCTTAATGTATTGCCCTTCTAGCTTCTTTGGTTCTTATGTCGGTGG---ACAAGTT-----     | -432 |
| Cf | CCTTTG--GAGAGGGTTCTAACCTTAATGTAGTAC--CCTTCTAGCTG-----TGGTGG---GGGAGTT-----             | -428 |
| Dn | -----TTTTAGCTAATTTGATCCAG-----                                                         | -321 |
| Ec | CCCTTG--AAGAGGGTTCTAACCTTAATGTATTGCTCCTTCTAGCTTCTTTGGTTCAAAAAGTTTGGTAG---GGAAGTT-----  | -426 |
| Hs | CCCTTG--AAGATGGTACTAACCTCAATGTATTATCTCCTTCTAGCTTCTTTGGTTCAAAAAGTTTGGTGA---AGGAGTT----- | -426 |
| La | GCTTTGAAAGGTGGTTC--AACCTCGATGTACTGCCGCTTCTCACTTCTTTGATTCAAAAGTTTGGTCA---GGAGGTT-----   | -447 |
| Oc | CCTTGG--AAGATGGCTCTAACCTTAAGGTACTACCCCTTCTTAACTTCTTGGTTGAAAGTTTGGTGGTGGTGGGATT-----    | -380 |
| Sa | -----TGGTCCTCAG-----GGGACCATATGC---ATGCT---AGGGAT-----                                 | -389 |
| Ss | CCTTTG--AAGAGGTTTCTAACCTTAATGTATTGCCCTTCTGCTTCTTTGGTTCAAAAAGTTTGGTGG---GGAAGTT-----    | -433 |
| Cp | CCTTTGACA--ATGGTCTTAATCTTAATGTGTTATTGTTTCTTAGCTTCTTGGGTCAAAAAGTTTGGTGGT---AGAGCT-----  | -401 |
| Mm | -----GTTTTTAGCTGTAAAAAT-----                                                           | -216 |
| Rn | -----AGCTGTAAAAAT-----                                                                 | -214 |
| Mr | -----AGCTATAAAATAG-----AGGAT-----                                                      | -233 |

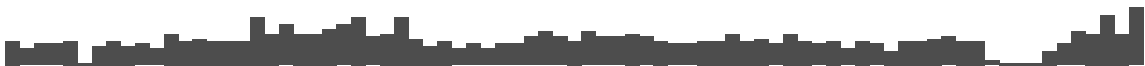

## TF JARID2

|    |                                                                                 |      |
|----|---------------------------------------------------------------------------------|------|
| Bt | ATTCAATTCGA-CTAAATGAGGTATTTGGATAGTTTATTAACATATCAAAGCTCTACCCCCCTCCTTCCTCCT-----  | -360 |
| Cf | ATACCTTCTGG-CTGAAAGAGGTATTTGGATTCTTTATCAACATATCAAAGCTT--ACTTCCTCTCTTCTTCCC----- | -358 |
| Dn | -----                                                                           | -321 |
| Ec | AGACATTCAG-CTGAATGAGGTATTTGGATACTTTATCAACATATCAAAGCTGTA-CTACTTCAGTCTTCTC-----   | -355 |
| Hs | ACAAATTCGGTTTGAATGATATATTTGGATACTTTATCAACACATCAAAGCTCTACCTA-TCCCTTCCCCCA-----   | -354 |
| La | ATGCATTCGG-CTGAACGAGGTACTTGGAGGACGTAGCAACAAATCGAAGTTCTCC-----TCTTTCCTCTA-----   | -380 |
| Oc | ACACGTTCTGG-TTTAACGAGGGTTTCAGATATTTTACCAACATATGAAAGC-----ACCCCTCA-----          | -321 |
| Sa | TGAA-----CCGG-T-----AGG-----CCGCATGCAATGCTATATTACGACTGCG-----TCCTCACACAATTC     | -335 |
| Ss | ATACACTCTGG-CTAAATGAGGTATTTGGATCTTCATTAAACATATCAAAGCTCTACCTCCCT-TTTCCTCCT-----  | -362 |
| Cp | ACAAATGCTGG-TTGAATGAGG-----TTACTTCCATCAACACATCAAATTCCTATTT-----TCCTCAC-----C    | -341 |
| Mm | A-----ATCCTTCATTATCGCGCAAAAT-----                                               | -193 |
| Rn | A-----ATCTTTCAATTACCATATAAAAT-----                                              | -191 |
| Mr | A-----ATCCTTCAATATCACACAAAT-----                                                | -210 |

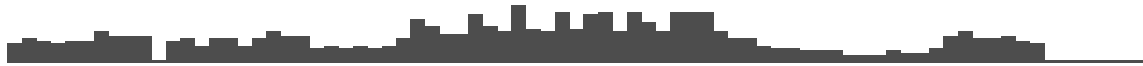

|    |                                                                                  |      |
|----|----------------------------------------------------------------------------------|------|
| Bt | -----ATTT-----CAAAACCAAATTAACTAAACCTTTTCATTGTGTACACTGTTTG-GGAGAATT-TTAGCA---T    | -296 |
| Cf | -----ATTTCAAA-----CAAAACCAAACCTAACTAAACCTTTTCATTGTGTATGTTGTTTGGAGAATT-TTAGCA---T | -289 |
| Dn | -----                                                                            | -292 |
| Ec | -----ATTT-----CAACAC-----TAAACTAACATCTTTTCATTGTGTATGCTTTTTATGGAGGATT-TTAGCA---T  | -295 |
| Hs | -----TTCT-----CAAAACCAAGCTGAATTAACATCTTTACATTTATTATGCAGTTTATGGAGGATT-TTAGCA---T  | -289 |
| La | -----ATCT-----CAAAACCAAACCTAAGTAGAAACCTTTACGTTTGTAGGACAGTTTGTAGAGAATT-TTAGCA---T | -315 |
| Oc | -----ATTT-----AATGACAAACTAACTAACACC-----ATTATGCAGTTTGTGGACAATT-CTATCAG---T       | -275 |
| Sa | CCAAAATCTTCTTTCTAAATCAGG-----GTTCTTTTCATTTTTAATA-----AGGAAAATA-GCATGG---T        | -275 |
| Ss | -----ATTT-----CAAAACCAAATTAACTAAACCTATTTCATTGTCTATCTGTTTGTGGAAAATT-TTAGCA---T    | -297 |
| Cp | CCATAATCT-----CAAAATCAA-----CACTTCATATTGCTATATAGCTTGTGGAGAATT-TTAGCA---T         | -281 |
| Mm | -----AATGAAATTACGCGTCA-----TGTCACCTGAGCTTACGTACCTCCATCTTTA---T                   | -144 |
| Rn | -----AATGGAATCGCGAGTTT-----TGTCACCTGAGCTTACGTACCACTATCTTTA---T                   | -142 |
| Mr | -----ATACAAATTTGGTGGTTCTCGATCGCTCTGTCA-TGAGTTTGGTACAATCATAATTAATTT               | -149 |

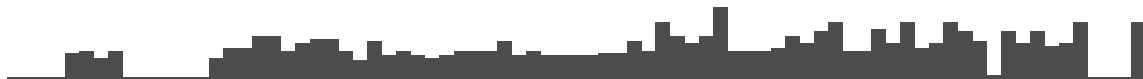

|    |                                                                                   |      |
|----|-----------------------------------------------------------------------------------|------|
| Bt | CAGTTATCTAATTTGATTTACT---TAAAGTCCCTATTTTACAGACAGAAACCCATTGAAAAACC-TTTGAAATCATGG   | -221 |
| Cf | TAGTTATCTAATTTGACTTCCT---CAACGTCCCTATTTCTATAGATAAGAAACCCATTGAAAGCCC-ATTGAATTTGTGC | -214 |
| Dn | ATGTTATCTA-TTTGATTTAGC---CAGTGTCCC-ATTTTATAGATGAGGAATT--TGAAAAACCGATTGGAGTTGTGA   | -220 |
| Ec | TAGTTACCTAATTTTATTTCACT---GAAAGTCCCTATTTTGTGTA---AAACCCATTGAAAAACC-ATTGAAGTTGTAT  | -223 |
| Hs | TAATTATT--GCTTGATTTACT---CAATGTCCCCATGTTATAGATGAGAAC---TGAAAAACCC-ATTGAAGTTGTGA   | -219 |
| La | CACTTATCTAATTTGATTTACT---CAACATTTCTATCTTATAGATGAAAACT--TTGAAAACT-ATTGATGTTGTAA    | -242 |
| Oc | TAAGTG---TGGATTTACA---CACCGTTTCTGTTCTATAGATGAGAA-----CTTA                         | -218 |
| Sa | GATTCGACT--TTTTATTGCTC---CACCATTTCTTTTTTACGGCCGAAG-----GATGGTTAA                  | -220 |
| Ss | TAGTTATCTAATTTGATTTACT---CAACGTCCCTATTTTGCAGATGGGAATCCATTGAAAAACG-TTTGAAATCGTGG   | -222 |
| Cp | CAGTTAA---TCGATTTGGTT--TCTTGTTCCTTTTATAGATGAAAAATT-----TGTAAGTGTATGA              | -222 |
| Mm | TCAT-----TTTAAAT---T                                                              | -133 |
| Rn | TTAT-----GTTCA---T                                                                | -132 |
| Mr | TCAT-----CTTAATTACTC                                                              | -134 |

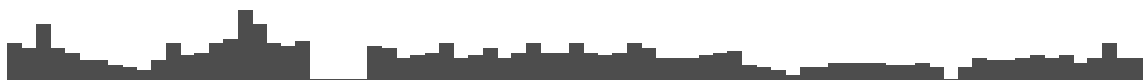

|    |                                                                                 |      |
|----|---------------------------------------------------------------------------------|------|
| Bt | CTCC-----TGGACTAGAAATGAAGCCTACTTCCAGTATAATGTTCTTTTATGTAATGTTGCTATTTTCTTGAA--    | -153 |
| Cf | T-----CAAGCAATGAAGGCTACTTCCAGTCTAGTGTCTTTTCTA--ACGTGCTGTTTTCTTGAAAT             | -153 |
| Dn | CTCC-----CAGACTAGAAATGAAGCCTACTTCCAGGCTGGTGTCTTTCTAGTATGGTACTGCTAAGTTGAAAT      | -150 |
| Ec | CTCT-----TGGACTAAAAATGAATACTATTTCTAGTCTAGTGTCTTGCTAATATGTTGCTGTTTTCTTCAAAT      | -153 |
| Hs | CTCC-----TGGTCTAGAAATGAAGTCTACTTCCAGT-TAATGTTCTTTCTGGTATGCTTTTCTTTGAAAT         | -150 |
| La | CTCC-----TGGAACGGGAAGTGAGACTTACT-----TTCTTGTAGAAATGCTTCGGATTGTTGGAAT            | -184 |
| Oc | CTCT-----TGAAATAGAAATGACCCCT-TTTCAGTTTAGAAATTTTTCTAGGATCCCCCTGTTTTCTCAGCT       | -149 |
| Sa | TTCTCCTCCGAAGATAAAAGTACGTGAAACCGTCTTTTCAGTATAGCGTTTTTTATAAATAGATATATAATTTTGAAAA | -140 |
| Ss | CGCC-----TAGAATACAAATGAAGCCTATTTCCAGACTGATGTTCTTTTAAATATGTTGTTGTTTTCTGAAAT      | -152 |
| Cp | TTCT-----TAGACTTAAATGAAGTCTACTTCCGCTCTAGGTTCTAGGTACAT-GTTAAATTTATTTTATTTT       | -153 |
| Mm | -----TTTTTATAATATAGTTAGACCTAAAGGTCCAAT-----                                     | -100 |
| Rn | -----TTTTTAAATATAGTTGGAACCTAAAGGTCCAAT-----                                     | -99  |
| Mr | -----TTTTTAAAGAAATAGTTTGCAATTAACCGCAAT-----                                     | -101 |

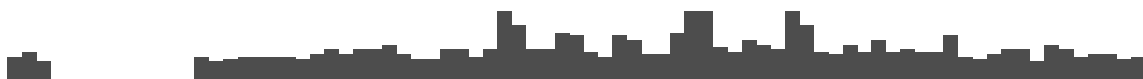

Bt CT---CTCTTTTT-----CTTGTTACTGGGTAAAT-----TTTTGAAACGGGCT---AAACT--- -108  
 Cf AT---CCCTTTTT-----CTTGTACTGGTTAAA-----TTTTGAAACGAGTT---AAACC--- -109  
 Dn CTC---CCCATT---CTTATAATTGGTGACAT-----TTTGAGCTGTCT---AAACC--- -104  
 Ec AC---CCCTTTTT-----CTTGTTCCTAAGTAAA-----TTTGGGGCGGGCT---AAACC--- -109  
 Hs TTC---CCTTTTTT-----GTCCTTACTGGGTAAA-----TTTTGAAACCAACC---AAATC--- -105  
 La GG---CCTTTTGT-----CTTATTCTGGGTAAATTTTTTTTTTTTTTTTTTTTTTTTGGAGCTGACTAGAAAAATCCACG -117  
 Oc CTC---CTCATT---CTGTTACTGGGTACAGCT-----TGAGTCGACC---AAACCT--- -102  
 Sa TATTATTGCTTATAAATTGAGGGGTGCAATTGCTCCAAT----- -100  
 Ss CT---CTCTTTTT-----CTTTTACTGGCTAAA-----TTTTGAGCGGGCT---AAACT--- -108  
 Cp TATTTTTCATTTT-----TGCAATTGTGTAAATTTT-----GAACTGTCTA---AACTTCAA -103  
 Mm ----- -100  
 Rn ----- -99  
 Mr ----- -101

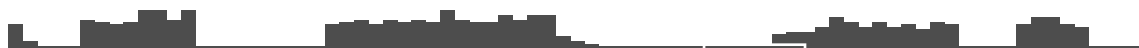

**CNS1**

Bt -----ACAAATATGTCTGGC--TTTCAATCTTC-TAGGCCACTCCTCTTCTATTCCCTC-CG-CCC--TCAGT -47  
 Cf -----ACAAAGATGTCTGGC--TTTCAATCTTC-TAGGCCACTCCTCTTCTACTCCCTC-CGCCCT--CAGGT -47  
 Dn -----ACAAAGATAAATGAC--TTTCAATCTTC-TAGGCCCTCCTCTTCTCCTCCCTC-CGCCCTTAACC-- -42  
 Ec -----ACAAAGATATATGGC--TTTCAATCTTC-TAGGCCACGCTCTTCTACTTCTCTC-CACCCC--CCAGT -47  
 Hs -----ACAAAGATGTCCGGC--TTTCAATCTTC-TAGGCCACGCTCTTATGCTCTCTC-CGCCCC--TCAGC -44  
 La GAAAAACCAACGAAAAAATGTCCAGC--TTTCAATTTTTC-CAAGCCACGCTGTTCTGCTTCTCTC-CACCCAT--GCAG- -44  
 Oc -----CTAAGATGTCTGGC--TTTCAATCAGCGGGGGCCACGCTCTTGTTACCCCG-CCCCAAC-- -43  
 Sa -----ATAGCCGGT--TTTCAATCTTC-TAGGCCACTCCTCTTCCCTCCCTCCATACCCCA----- -46  
 Ss -----ACAAATATGTCTGGC--TTTCAATCTTC-TTGGCCACTCCTCTTCTACTCCCTC-CG-CCC--TCAGT -47  
 Cp -----GAAAGATGTCAAAC--CTTTAATTTTC-TAGGCCACTCCTCTTCTGTGTCTCTC-CGCCCTCA-- -46  
 Mm -----AAGATGTCTAGAA--TTGCAATCTTC-TTGGCCACTCCTCTTCTGCTCTCTC----- -52  
 Rn -----AAGATGTCTAGAC--TTCCAATCTTC-TTGGCCACTCCTCTTCTGCTCTCTC----- -51  
 Mr -----AAGAGTCTGGGACTTTTCCGCAATTT-CTGGCCACTCCTCTTCTGCTCTCTC----- -51

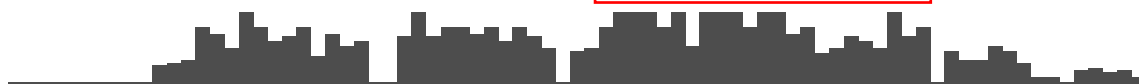

**TF CTCF**

Bt CCCCCTCCCTCTCACTT-----CTTAAAGCGCTGCACTTTGCTGCGACCGCCATATTTCTTTCTTTTCCCGAGA-TG 22  
 Cf TCCCTCCCCCTCACTT-----CTTAAAGCACTGCAATTTGCTGCTGCGCCATATTTCTTCTTTTCCCGAGA-TG 22  
 Dn -----CCCCCTGAAC--CTTAAAGCGCTGCAATTTCTGCTGCTGCGCCATATTTTCTTCTTTTCCCGGGG--TG 21  
 Ec CCCCCTCCCCCTCACTT-----CTTAAAGCGCTGCAATTTGCTGCTGCGCCATATTTTCTTTTCTTAGGG-TG 22  
 Hs ---CCCCCTTCAAGTT-----CTTAAAGCGCTGCAATTTGCTGCTGCGCCATATTTCTTACTCTCTCGGGGCTG 23  
 La -CTCTACGTCAAGT-----TTTAAAGTCTGCAATTTGCTGCTGCGCCATATTC--TTCTGTGAGCCCGG 19  
 Oc ---CCCCCTCAATT-----CTTAAAGCGCTGCAATTTGCTGCTGCGAGCCATATTTCTACTTCTCTCCGAGGTTG 23  
 Sa -CCCTCTCCCTCCTTC-----CTTAAAGTCTGCAATGATGCTGCGAGCCATTTTTC-----CGCCATGCGGTG 18  
 Ss CCCCCTCCCTCTCACTT-----CTTAAAGCGCTGCACTTTGCTGCGACCGCCATATTTCTTCTTTTCCCGGG-TG 22  
 Cp -GCTCCCCCTCACTT-----CTTAAAGCGCTGCAATTTGCTGCTGCGCCATATTTCTTCTCTCTCGGGGACA 23  
 Mm -----CGCCTTCAGCGCCGCGGATCAGTTAAAGGCGTGCAACGGCTTGCTCCAGCCATGTTTGCTCGTTTCCCGTGGAATG 23  
 Rn -----CGCCTTCAGCG--CGCCAGTCAAGTTAAAGGCGAGCACTGCTTGCTGCGAGCCATATTTGCTCGTCTCCCGTGGAATG 23  
 Mr -----CGCCTTGGGCGTAC--GATCATTTAAAAACATGCAAGTGCTTGCCGAGCCATGTTTGCCAGTTTCCCGTGGAATG 23

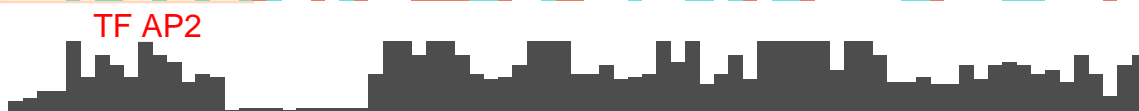

Bt GAAGC-TTATTAATATTGGAATTTCTTTGCTGTGTTCTTTCT-GGAACATTTT-CCAGACCCCAACCATGC---CTT 96  
 Cf GTAGC-TGCTAACAAGTGGGTGCTTTCGCGGTGTTGTTCTTTCT-GGAACGTTTT-CCAG-CTCCAACCATGC---CTT 95  
 Dn GCTAT-CCGCTAACTGTAGGTCTCTCTTCTTTCTTATTGTTCTTTCC-GGAACGATTT-CCAGCCCCCTACTACCC---CTC 95  
 Ec GAAAC-TTGGTAACACTTGATCTCTTTGCGCGTGTGTTCTTTCT-GGAACATTTT-CCAGCCCCCAACCATCC---ATT 96  
 Hs GAAGC-TTCTGACTGAAGATCTCTCTGCACTTGGGGTCTTTCT-AGAACATTTT-CTAGTCCCCCAACATCCC---TTT 97  
 La AGAGA-T--CTGAACCCCGATGTTTCTGCTTGGCTCTTTCT-GGAA-GCGTT-AGAGCCCTGAGATGGGC---TTT 90  
 Oc GAAGC-TGCTAGCCATAGTTCTTTCTGTACTTATGTTCTTTCT-GGAACATTTT-CCAGTTCCCCCAATTCG---CTT 98  
 Sa AAATC-TTCTGAAA---AGGACTTCTTACCCCTGTGTTCTTTCT-GGATCATTTTCCAGCATGCTATTACCC---CTA 90  
 Ss GAAGC-TTGTGTTATTGGAATCTCTTTGCGCGTGTGTTCTTTCT-GGAACATTTT-CCAGCCCCAGCCATGC---CTT 96  
 Cp AGAGC-TTCTTAACCGTAGGTCTCTCTCCATTTGTTATTCTTTCC-GGGACATTTT-GTAGCTCTCTAATCCT---TTT 97  
 Mm TGGG-TTCTT---CCGTGGTTCTCTCCATCTAAGGAGCTTTGGGGGAACATTTT-TAGTTCCCTTACCACCAAGCCTT 98  
 Rn TGAGGTTTCT---CCGTGGTTCTCTCCATCTAAGGGCTTTTGGGGGAACATTTT-TAATCCCCCTACCACCATGCCTT 98  
 Mr TGAGC-CTCT---CTGTGGTCTCTGTCCATCTATCGGGGTCTCTGGGAACATTTT-TAGTTCCCTTACCACCATGCCTT 98

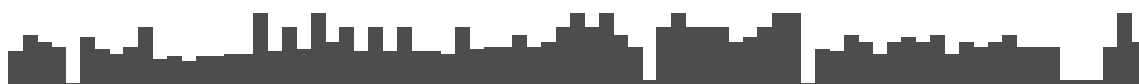

|    |        | *   *   * |           | *             |            | *                          |                               |
|----|--------|-----------|-----------|---------------|------------|----------------------------|-------------------------------|
| Bt | ATGG   | CATA      | TTTC      | -TTGG         | AAAAAA     | TTAC                       | CCAAAAAT--TCATAAAATATTTTT 146 |
| Cf | ATGCC  | GTATTT    | CTTTAAG   | AAAAAT--TC    | CCCAAATT-- | CCATAAAATA-TCTT 143        |                               |
| Dn | AGGGC  | --ATTT    | CCCTCAA   | AGGAGCC       | ATGAAGATT  | --CCTAAATGTT-TT 143        |                               |
| Ec | ATGGC  | ATA       | TTTCTTTAG | AAAAA--TT     | CACCAA     | AAATT--CCATAAAATATTTTT 145 |                               |
| Hs | ATGGC  | GTATTT    | CTTTAAAA  | ---AAATC      | ACCTAAAT   | --CCATAAAATA-TTTT 144      |                               |
| La | G-GGC  | ATATTT    | CTCTG     | AAAAGCAA      | ATCACCG    | AAATTAGTTCTAAAC--TAGG 140  |                               |
| Oc | ATGGGG | CATTT     | CTTAAG    | AAAA--AT      | CACCAA     | ATGA--CATAAAGGGTTT 146     |                               |
| Sa | CTGGGG | TACTT     | ATTTTTA   | AGGACCATC-CT  | AAATT--    | CCATAATATACTTGA 139        |                               |
| Ss | ATGGC  | ATA       | TTTCTTTA  | AAAAAAATCC    | ACCAA      | AAAT--TCATAAAATGTTT 147    |                               |
| Cp | ATAGG  | GTACTT    | AGCAAA    | CAAAAGCA      | AT-CAGA    | ATT--ACATAAAATATTT-A 145   |                               |
| Mm | ATGGC  | TTATTT    | AAGAAAA   | CA-----T      | ATCAAA     | ATT--CCACGAGAT-----T 138   |                               |
| Rn | ATGGT  | GTATTT    | AAGAAAA   | CA-----T      | ATCAAA     | ATT--ACATAAGAT-----T 138   |                               |
| Mr | ATGGT  | GTAA      | TTAAG     | AAAAATA-----T | ATCAAG     | ATT--CTATAATAT-----T 138   |                               |

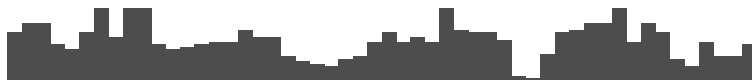

Supplement: Supplementary file [file 1]
